# Supplementary material for: Diamondization of chemically functionalized graphene and graphene–BN bilayers
Source: Royal Society of Chemistry journal article supplement (doi:10.1039/c2cp40635g), 2012-01-01
Supplement: c2cp40635g.pdf [file c2cp40635g.pdf]

## Support Information

# Diamondization of Graphene and Graphene-BN Bilayers: Chemical Functionalization and Electronic Structure Engineering

Long Yuan, Zhenyu Li, Jinlong Yang,\* Jian Guo Hou

Hefei National Laboratory of Physical Sciences at Microscale, University of Science and Technology of China, Hefei, Anhui  
230026, China

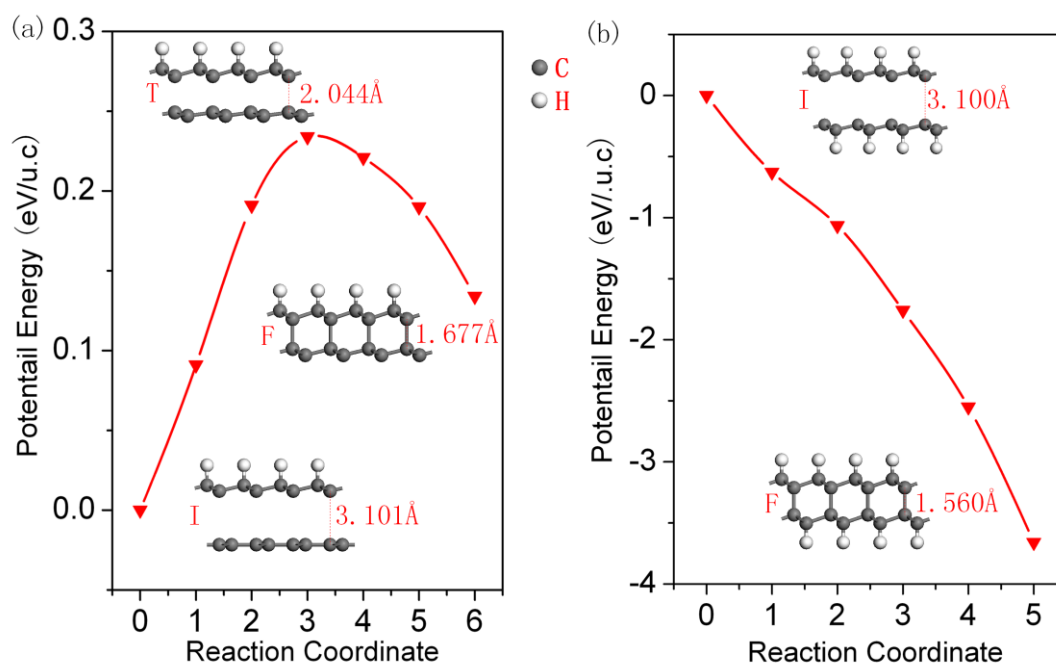

**Fig. S1.** Minimum energy path for transition processes (a) from single-side functionalized bilayer to diamondized film, (b) from double-side functionalized bilayer to diamondized film.

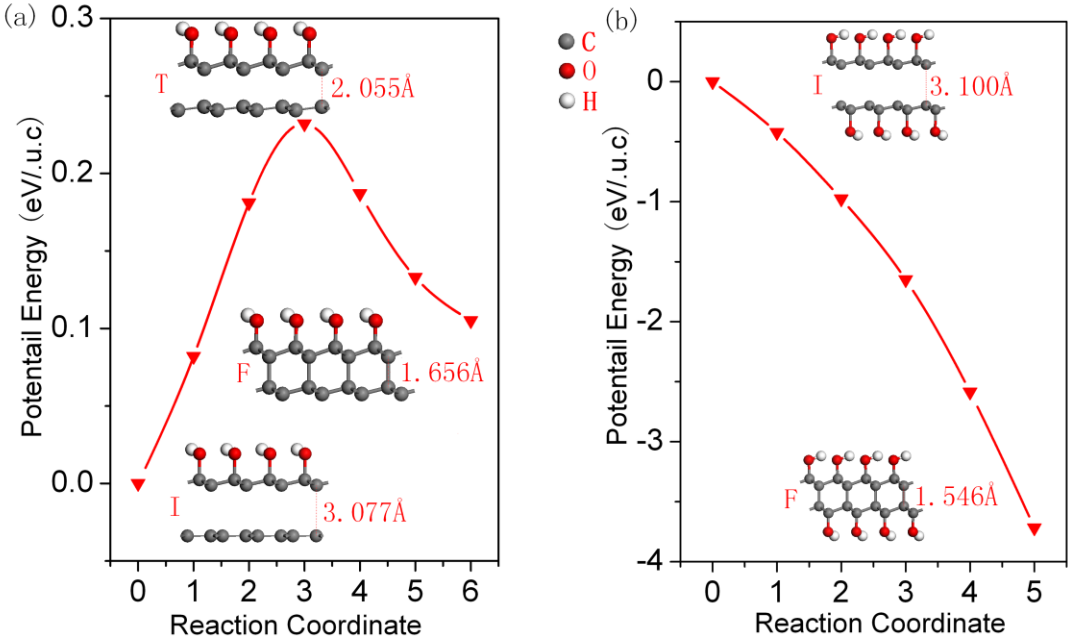

**Fig. S2.** Minimum energy path for transition processes (a) from single-side functionalized bilayer to diamondized film, (b) from double-side functionalized bilayer to diamondized film.

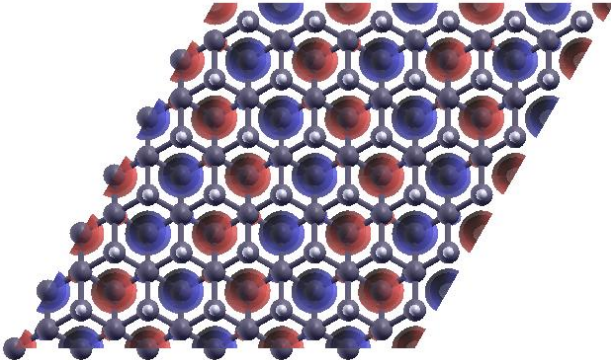

**Fig. S3.** Another AFM configuration with an energy 0.041 eV per unit cell higher than the FM ground state..

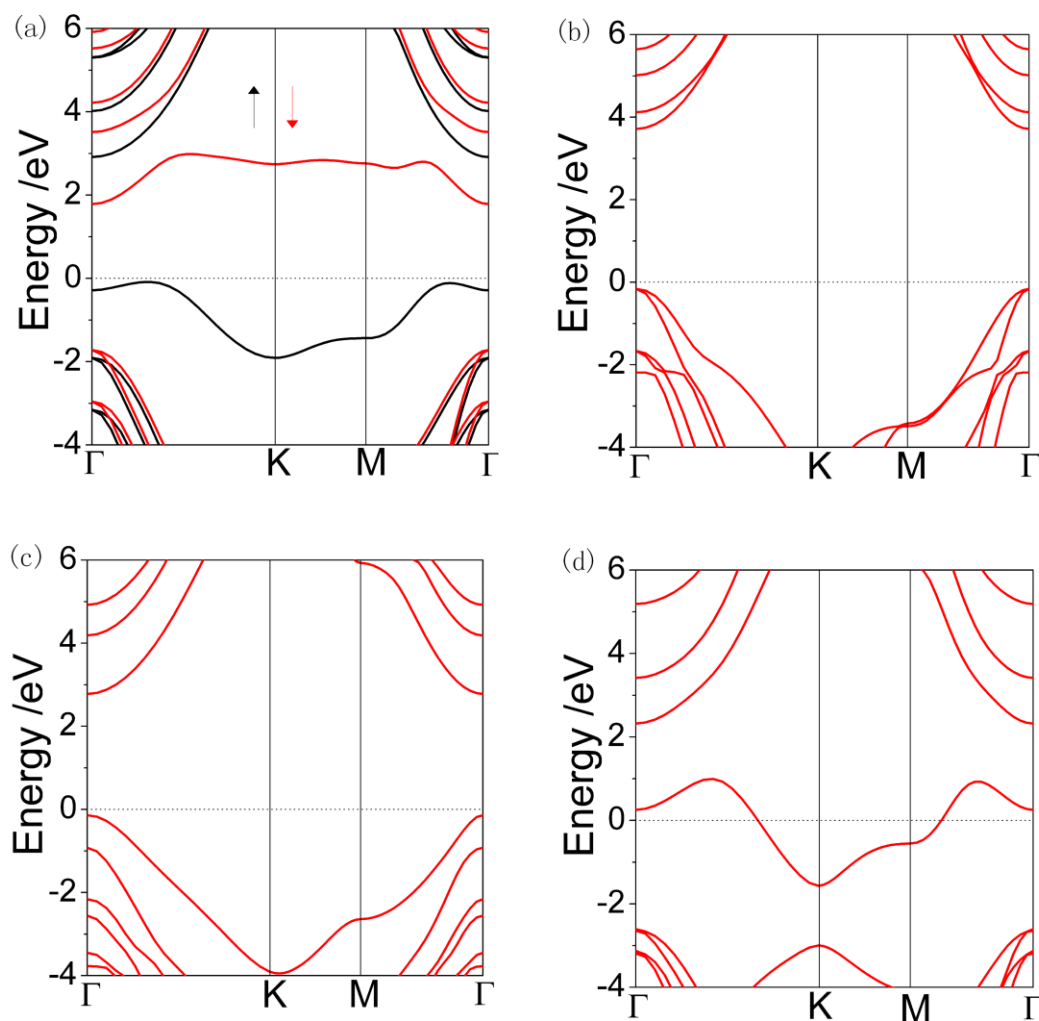

**Fig. S4.** HSE band structure of (a) H-C<sub>2</sub>, (b) H-C<sub>2</sub>-H, (c) H-C<sub>2</sub>-OH, and (d) H-C-BN.

The band gap of *h*-BN layer is computed to evaluate the accuracy of our HSE procedure. The calculated band gap of *h*-BN layer is 5.69 eV, very close to the experiment value of 5.97 eV,<sup>1</sup> while PBE calculation predicts a band gap of 4.36 eV, underestimated by about 27% when compared to the experiment value. Three diamondol nanofilms such as H-C<sub>2</sub>, H-C<sub>2</sub>-H, and H-C<sub>2</sub>-OH are computed for tests. For H-C<sub>2</sub>, HSE band structure calculations predicts it a indirect semiconductor, with a band gap of 1.868 eV. For H-C<sub>2</sub>-H and H-C<sub>2</sub>-OH, HSE band structure calculations both predict that they are direct semiconductor, respectively, with a band gap of 3.875 eV and 2.917 eV. For H-C-BN, both PBE and HSE predict it a metal.

## Notes and references

1. K. Watanabe, T. Taniguchi, H. Kanda, *Nat. Mater.*, 2004, 3, 404.
